# Supplementary material for: Exome Sequencing and Optical Genome Mapping in Molecularly Unsolved Cases of Duchenne Muscular Dystrophy: Identification of a Causative X-Chromosomal Inversion Disrupting the DMD Gene
Source: MDPI journal article supplement (doi:10.3390/ijms241914716), 2023-09-28
Supplement: s1 [file s1]

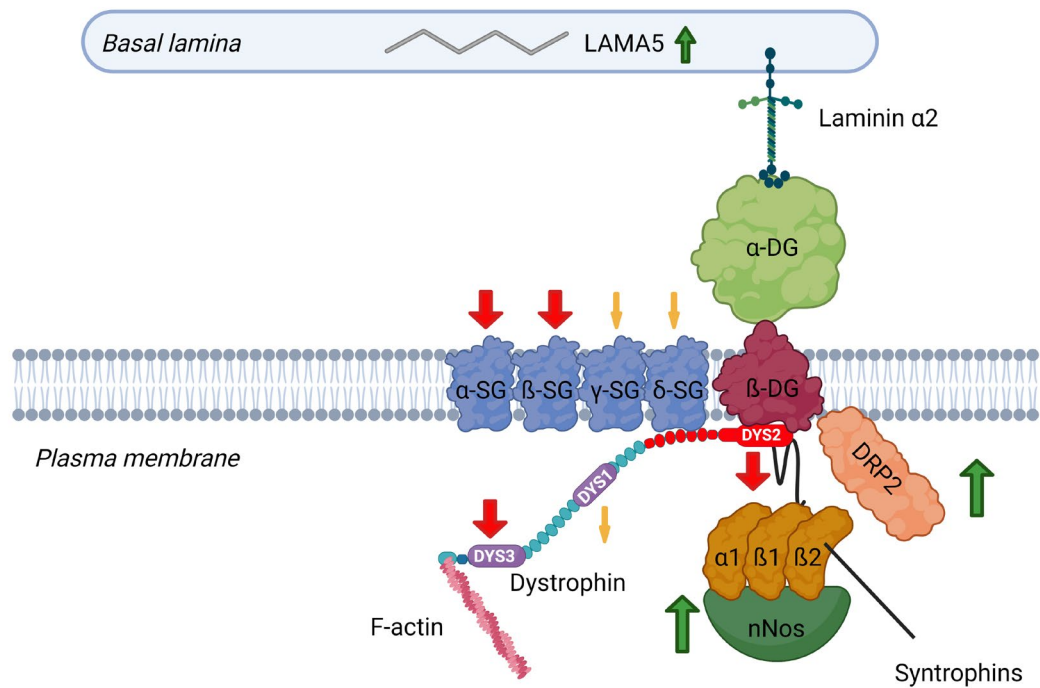

**Supplementary Figure S1.** Schematic figure of the dystrophin sarcoglycan complex: absence of proteins in immunofluorescence studies (red arrows), residual staining of proteins (yellow arrows), increased staining of proteins (green arrows) in patient 3. Red part of the dystrophin: schematic location of the inversion of patient 3 (created with BioRender.com).
